# Supplementary material
Source: publisher figshare collection journal article supplement (https://acs.figshare.com/ndownloader/files/5185771)
Supplement: Supplementary file 1 [file 5185771]

**XAFS Evidence for the Formation of Pb(II) Inner-sphere Adsorption Complexes  
and Precipitates at the Calcite-Water Interface**

Ashaki A. Rouff, Evert J. Elzinga, Richard J. Reeder, and Nicholas S. Fisher

**Supporting Information:**

3 Pages

1 Table, 2 Figures

|                                   | <b>μM initial Pb</b>   |                        |                        |                        |                        |
|-----------------------------------|------------------------|------------------------|------------------------|------------------------|------------------------|
|                                   | <b>1</b>               | <b>5</b>               | <b>10</b>              | <b>20</b>              | <b>60</b>              |
| <b>Pb-phases SI</b>               |                        |                        |                        |                        |                        |
| Cerussite                         | -0.16                  | 0.54                   | 0.84                   | 1.14                   | 1.62                   |
| Hydrocerussite                    | -0.74                  | 1.35                   | 2.26                   | 3.16                   | 4.59                   |
| <b>Batch Uptake</b>               |                        |                        |                        |                        |                        |
| *Γ (moles Pb per m <sup>2</sup> ) | 1.0 x 10 <sup>-6</sup> | 5.1 x 10 <sup>-6</sup> | 1.1 x 10 <sup>-5</sup> | 2.9 x 10 <sup>-5</sup> | 9.8 x 10 <sup>-5</sup> |
| Pb on calcite (ppm)               | 2170                   | 10491                  | 22814                  | 59757                  | 202484                 |
| Pb atoms per Ca site              | 0.13                   | 0.61                   | 1.33                   | 3.47                   | 11.77                  |

Table S1. Saturation indices for Pb-bearing phases and results from batch uptake experiments for relevant sorption samples.

\*Γ = Pb sorption density

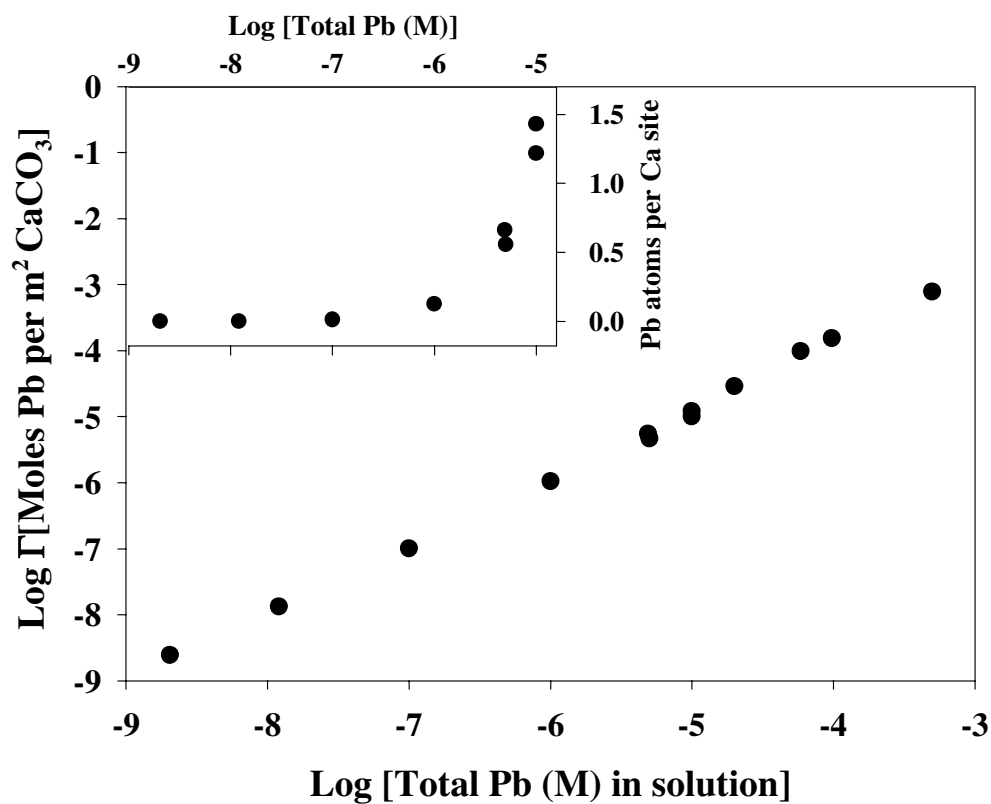

Figure S1. a) The effect of initial Pb concentration on sorption density  $\Gamma$ . Inset: b) Theoretical site occupancy as a function of initial Pb concentration for the concentration range  $10^{-9}$  to  $10^{-5}$  M Pb showing the onset of oversaturation.

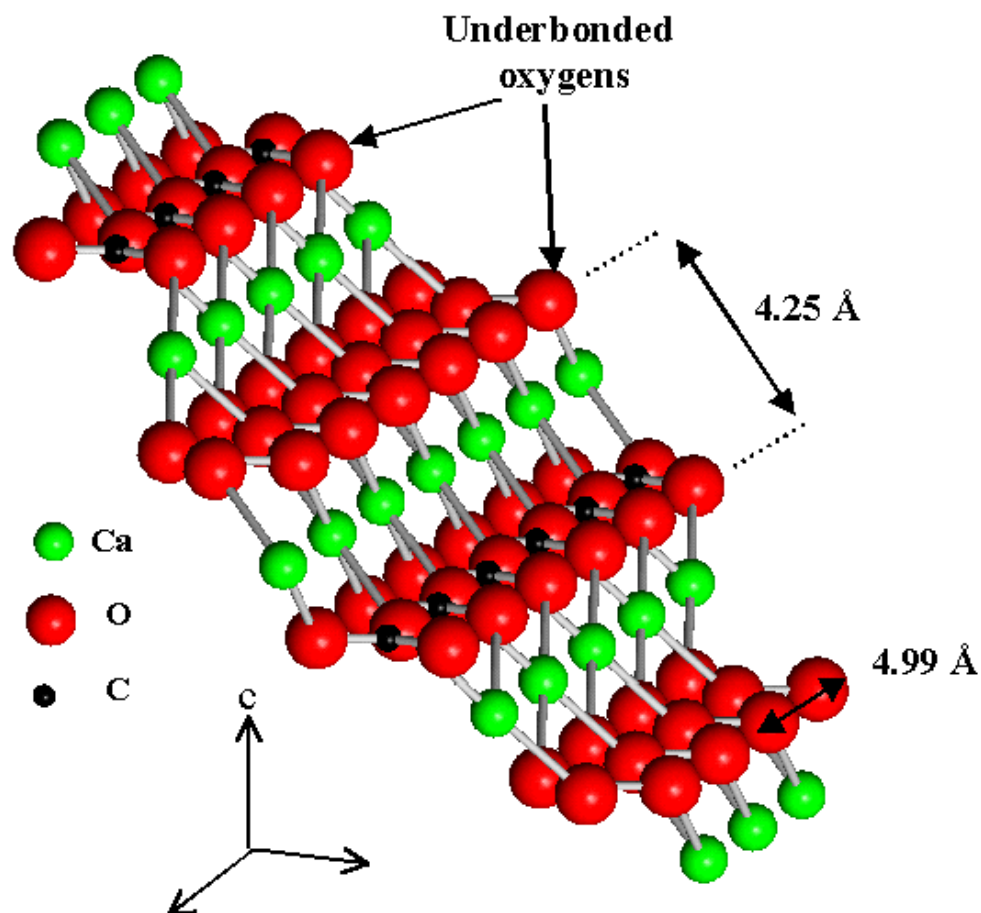

Figure S2. Location and O-O distances of underbonded oxygens on a calcite ( $10\bar{1}4$ ) terrace. These atoms have one unsatisfied bond compared to those at step kink sites, which have two, and therefore more degrees of freedom. O-O separations are too long, and flexibility insufficient to expect binding of the Pb adsorption complex to two of these oxygen atoms.
